# Supplementary material for: The relationship between sleep disorders and the risk of colorectal cancer among United States adults in the NHANES from 2005 to 2016
Source: Research Square preprint supplement (doi:10.21203/rs.3.rs-6648199/v1), 2025-06-11
Supplement: Supplementary file 1 [file edaa07250ae5549c4c09806d.xlsx]

## Sheet: Sheet1
Additional file 1. Variable definitions and corresponding NHANES questionnaire IDs used in the study.
Varible	Variables ID	Years
Age	DEMO_D-I (RIDAGEYR)	2005-2016
Gender	DEMO_D-I (RIAGENDR)	2005-2016
Race	DEMO_D-I (RIDRETH1)	2005-2016
Education	DEMO_D-I (DMDHREDU)	2005-2016
Smoke	SMQ_D-I (SMQ020)	2005-2016
High blood pressure	BPQ_D-I (BPQ020)	2005-2016
Asthma	MCQ_D-I (MCQ010)	2005-2016
Weak kidneys	KIQ_D-I (KIQ022)	2005-2016
Arthritis	MCQ_D-I (MCQ160A)	2005-2016
Heart failure	MCQ_D-I (MCQ160B)	2005-2016
Angina	MCQ_D-I（MCQ160D）	2005-2016
Heart attack	MCQ_D-I (MCQ160E)	2005-2016
Stroke	MCQ_D-I (MCQ160F)	2005-2016
